# Supplementary material
Source: publisher figshare collection journal article supplement (https://sage.figshare.com/ndownloader/files/14003507)
Supplement: Supplementary file 1 [file 14003507]

## Appendix A:

Summary of all scenarios along with the categories they belong in as follows:

- A) Trust and acceptance
- B) Support in needs and goals
- C) Symbolic/physical expressions
- D) Sharing time with others,
- E) Other possible sources of love,
- F) Controlling behavior from others, and
- G) Control scenarios with a neutral connotation in terms of loving signals.

| Category | Item # | Most people feel loved when...                              | T/F Mean | Consensus label | Consensus psd | Item Difficulty |
|----------|--------|-------------------------------------------------------------|----------|-----------------|---------------|-----------------|
| A        | 1      | someone supports them without expecting anything in return. | 0.93     | True            | 0             | -2.1974         |
| B        | 2      | they feel accepted.                                         | 0.88     | True            | 0             | -1.3622         |
| B        | 3      | they make up after a fight.                                 | 0.79     | True            | 0             | 0.2183          |
| C        | 4      | they are hugged.                                            | 0.88     | True            | 0             | -1.1765         |
| A        | 5      | somebody confides in them.                                  | 0.67     | True            | 0             | 1.1241          |
| E        | 6      | they feel connected to God.                                 | 0.88     | True            | 0             | -0.5343         |
| D        | 7      | they play sports.                                           | 0.20     | False           | 0             | 1.7615          |
| G        | 8      | the sun is shining.                                         | 0.45     | True            | 0.1285        | 3.7977          |
| F        | 9      | someone tells them what is best for them.                   | 0.31     | False           | 0             | 2.0747          |

|   |    |                                                                                                |      |      |   |         |
|---|----|------------------------------------------------------------------------------------------------|------|------|---|---------|
| B | 10 | someone is there just to listen.                                                               | 0.89 | True | 0 | -1.3596 |
| E | 11 | they feel appreciated.                                                                         | 0.91 | True | 0 | -1.8814 |
| D | 12 | they feel part of a team.                                                                      | 0.68 | True | 0 | 1.0941  |
| A | 13 | someone understands them.                                                                      | 0.88 | True | 0 | -0.9919 |
| C | 14 | someone is sexually attracted to them.                                                         | 0.62 | True | 0 | 1.8105  |
| C | 15 | they receive gifts (card, flowers etc.).                                                       | 0.87 | True | 0 | -1.0475 |
| D | 16 | they spend time with their child(ren).                                                         | 0.96 | True | 0 | -2.0212 |
| B | 17 | someone helps them out.                                                                        | 0.80 | True | 0 | -0.3005 |
| B | 18 | someone follows up to ask how a problem turned out.                                            | 0.74 | True | 0 | 0.2539  |
| B | 19 | someone gives them positive feedback on the internet (e.g., a Facebook like, a retweet, etc.). | 0.49 | True | 0 | 2.9849  |
| C | 20 | they get a compliment from a stranger.                                                         | 0.43 | True | 0 | 3.5182  |
| C | 21 | they make love.                                                                                | 0.88 | True | 0 | -0.964  |

|   |    |                                                               |      |       |       |         |
|---|----|---------------------------------------------------------------|------|-------|-------|---------|
| B | 22 | someone cares for them when they are sick.                    | 0.95 | True  | 0     | -2.319  |
| A | 23 | someone forgives them for something they did wrong.           | 0.86 | True  | 0     | -0.8243 |
| E | 24 | their pets are happy to see them.                             | 0.96 | True  | 0     | -2.5224 |
| E | 25 | they attend a religious ceremony.                             | 0.57 | True  | 0     | 2.5424  |
| D | 26 | they attend sporting events of their favorite team.           | 0.26 | False | 0     | 2.7968  |
| G | 27 | they solve a difficult problem.                               | 0.39 | False | 0.433 | 4.843   |
| F | 28 | someone else wants to know where they are at all times.       | 0.29 | False | 0     | 1.4615  |
| A | 29 | they are made to feel special.                                | 0.95 | True  | 0     | -2.5724 |
| D | 30 | they spend time with their family (e.g., holidays, vacation). | 0.94 | True  | 0     | -1.7773 |
| A | 31 | someone can immediately tell what is on their mind.           | 0.65 | True  | 0     | 1.4856  |
| B | 32 | someone does something nice for them unexpectedly.            | 0.89 | True  | 0     | -1.3477 |

|   |    |                                                           |      |       |   |         |
|---|----|-----------------------------------------------------------|------|-------|---|---------|
| B | 33 | someone is supportive of their life goals.                | 0.89 | True  | 0 | -1.5637 |
| C | 34 | a child snuggles up to them.                              | 0.97 | True  | 0 | -2.9984 |
| D | 35 | they are included in activities.                          | 0.75 | True  | 0 | 0.2075  |
| C | 36 | they receive a compliment.                                | 0.69 | True  | 0 | 0.6716  |
| F | 37 | someone insists to spend all of their time with them.     | 0.49 | False | 0 | 2.5711  |
| C | 38 | someone tells them: 'I love you'.                         | 0.95 | True  | 0 | -2.2649 |
| B | 39 | someone calls just to check in on them.                   | 0.91 | True  | 0 | -1.7241 |
| D | 40 | they are around people, having fun.                       | 0.70 | True  | 0 | 0.7633  |
| B | 41 | someone shows compassion towards them in difficult times. | 0.98 | True  | 0 | -3.376  |
| B | 42 | someone celebrates their accomplishments.                 | 0.89 | True  | 0 | -1.3951 |
| D | 43 | they spend quality time with someone.                     | 0.96 | True  | 0 | -2.5083 |
| A | 44 | they feel completely comfortable around someone.          | 0.94 | True  | 0 | -2.0318 |

|   |    |                                                                                 |      |       |   |         |
|---|----|---------------------------------------------------------------------------------|------|-------|---|---------|
| E | 45 | they hear or sing their country's national anthem.                              | 0.56 | True  | 0 | 2.7055  |
| G | 46 | they eat their favorite food.                                                   | 0.52 | True  | 0 | 2.7401  |
| F | 47 | someone is possessive about them.                                               | 0.35 | False | 0 | 1.487   |
| C | 48 | someone is polite to them.                                                      | 0.63 | True  | 0 | 1.4717  |
| A | 49 | they can share their opinions without being judged.                             | 0.90 | True  | 0 | -1.1101 |
| C | 50 | they are holding hands.                                                         | 0.88 | True  | 0 | -0.8283 |
| B | 51 | they experience an act of kindness.                                             | 0.85 | True  | 0 | -0.9488 |
| D | 52 | they have fun with their friends.                                               | 0.74 | True  | 0 | 0.3171  |
| C | 53 | when someone sends them signs of affection (e.g., slight smile, loving glance). | 0.91 | True  | 0 | -1.5258 |
| E | 54 | they feel close to nature.                                                      | 0.59 | True  | 0 | 2.1354  |
| B | 55 | a group recognizes their contribution.                                          | 0.64 | True  | 0 | 1.4156  |
| B | 56 | something nice happens to them unexpectedly.                                    | 0.72 | True  | 0 | 0.579   |

|   |    |                                                                   |      |       |      |         |
|---|----|-------------------------------------------------------------------|------|-------|------|---------|
| F | 57 | someone tries to change their behavior to be healthier.           | 0.48 | False | 0.02 | 3.739   |
| E | 58 | they are recipients of gratitude.                                 | 0.78 | True  | 0    | -0.0383 |
| C | 59 | someone kisses them.                                              | 0.88 | True  | 0    | -0.9261 |
| A | 60 | they feel someone has no expectations and they can be themselves. | 0.84 | True  | 0    | -0.5536 |

*Note.* The item difficulty scale ranges approximately from -4 to 4, with -4 being the easiest items, 0 being the medium, and 4 being the hardest items.
